# Supplementary material
Source: PubMed Central journal article supplement (PMC4355235)
Supplement: NIHMS654624-supplement-1.pdf [file NIHMS654624-supplement-1.pdf]

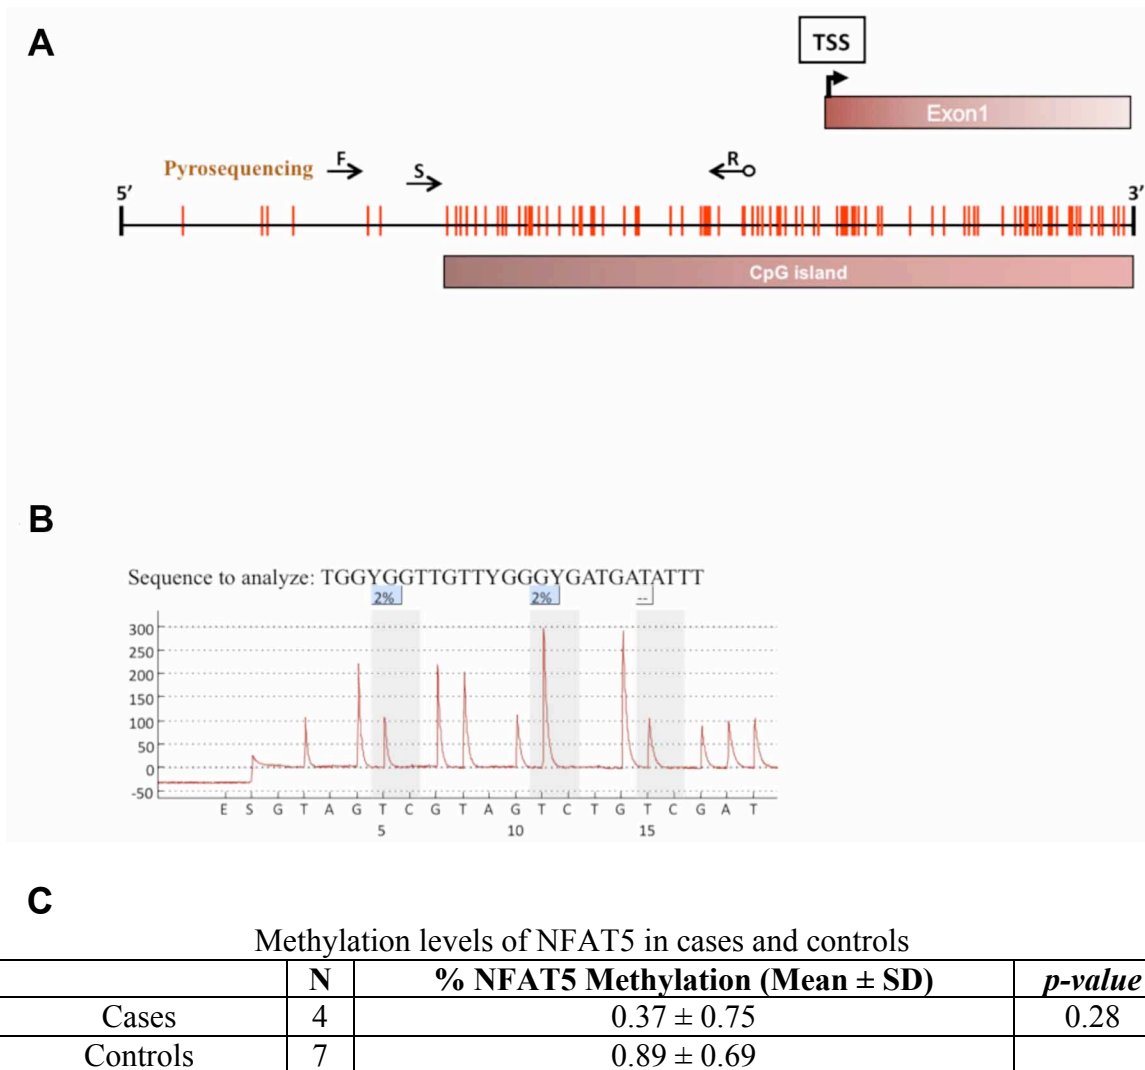

**Supplemental Figure 1. Methylation analysis of NFAT5 promoter lesion.** (A) Schematic illustration of NFAT5 genomic loci. Orange box: CpG island; vertical tick marks: CpG sites; black arrows: pyrosequencing primer location; TSS: Transcription start site; F, Forward primer; R, Reverse primer, and S, Sequencing primer. (B) Results of bisulfite pyrosequencing of NFAT5. Grey horizontal bars represent the mean methylation levels; grey vertical boxes in the pyrograms illustrate individual CpG sites analyzed. (C) Summarizes methylation levels of NFAT5 in cases and controls. P-value was calculated with a one-way ANOVA.

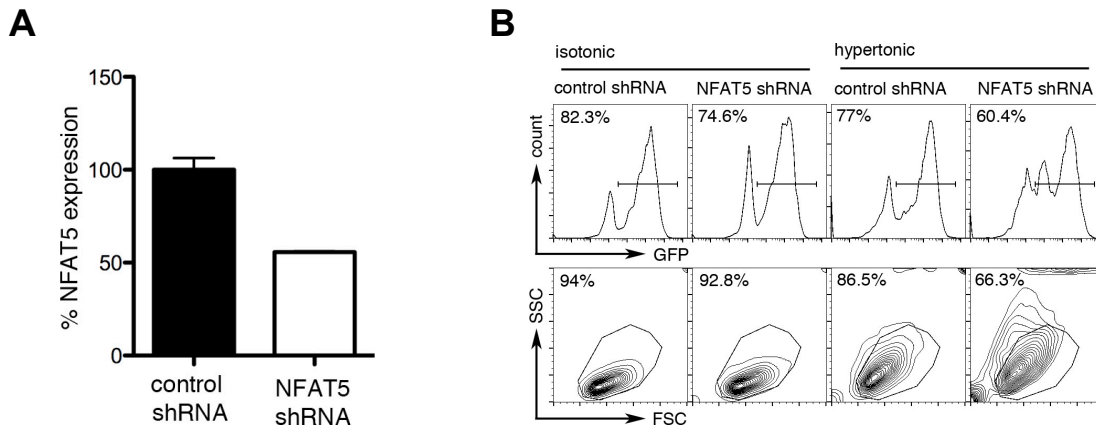

**Supplemental Figure 2. Assessment of survival in hyperosmotic condition by flow cytometry.** (A) Jurkat cells were retrovirally transduced with control shRNA or NFAT5 shRNA constructs. RNA was extracted from transduced, sorted GFP<sup>+</sup> Jurkat cells, and cDNA was synthesized using reverse transcription. NFAT5 mRNA expression level was measured using qPCR using  $\beta$ -actin as a reference gene. (B) Jurkat cells were retrovirally transduced with control or NFAT5 shRNA constructs and cultured in isotonic (280 mOsm/kg) or hypertonic (420 mOsm/kg) media. Cell survival was assessed by flow cytometry after 5 days. Cells expressing these constructs were detected and gated on the basis of GFP positivity. The percentage of live lymphocytes was determined by forward scatter (FSC) and side scatter (SSC) properties. Viability in hyperosmotic condition was expressed as % cell death and calculated with the following equation:  $(\% \text{ live lymphocytes in isotonic conditions} - \% \text{ live lymphocytes in hypertonic conditions}) / \% \text{ live lymphocytes in isotonic conditions}$ . The same methodology was applied to assess survival of human PBMCs subjected to hypertonic conditions.

**Supplemental Table I. Laboratory Evaluation**

| <b>Variable</b>                                                     | <b>Reference Range, Adults</b> | <b>Patient</b> |                 |
|---------------------------------------------------------------------|--------------------------------|----------------|-----------------|
| Serum Osmolality (Calculated) <sup>1</sup>                          | 278-305                        | 284            |                 |
| <b><i>Immunoglobulin analysis</i></b> <sup>1</sup>                  |                                |                |                 |
| Immunoglobulin G (mg/dL)                                            | 522 – 1703                     | 1078           |                 |
| Immunoglobulin A (mg/dL)                                            | 70 – 400                       | 82             |                 |
| Immunoglobulin M (mg/dL)                                            | 28 – 179                       | 106            |                 |
| <b><i>Immunoglobulin G Sub-class analysis</i></b> <sup>1</sup>      |                                |                |                 |
|                                                                     | <b>Normal range</b>            | <b>Month 0</b> | <b>Month 18</b> |
| IgG Sub-Class 1 (mg/dL)                                             | 382 – 929                      | 594            | 736             |
| IgG Sub-Class 2 (mg/dL)                                             | 241 – 700                      | 134            | 145             |
| IgG Sub-Class 3 (mg/dL)                                             | 22 – 178                       | 150            | 197             |
| IgG Sub-Class 4 (mg/dL)                                             | 4 – 26                         | < 1.0          | < 1.0           |
| <b><i>Neutrophil Function</i></b> <sup>2</sup>                      |                                |                |                 |
| Oxidative Burst                                                     |                                |                |                 |
| (% Oxidation positive Neutrophils)                                  | ≥ 90                           | 96             |                 |
| <b><i>Regulatory T cell analysis</i></b>                            |                                |                |                 |
| Foxp3 <sup>2</sup>                                                  |                                |                |                 |
| % Positive of CD4 <sup>+</sup> CD25 <sup>+</sup> CD127 <sup>-</sup> | 87 – 100                       | 92             |                 |
| Absolute Foxp3 (cells/mL)                                           | 23 – 232                       | 36             |                 |
| % Natural Tregs (% CD4 cells) <sup>3</sup>                          | 0.6 – 4.3                      | 2.7            |                 |
| Absolute Natural Treg (cells/mL)                                    | 5 – 43                         | 16             |                 |
| % Naïve Tregs (% CD4 cells)                                         | 0.1 – 2.3                      | 0.7            |                 |

|                                                                                                    |             |          |
|----------------------------------------------------------------------------------------------------|-------------|----------|
| Absolute Naïve Treg (cells/mcL)                                                                    | 0.4 – 22.0  | 4.2      |
| <b><i>Evaluation for CVID<sup>4</sup></i></b>                                                      |             |          |
| CVID Confirmation Flow Panel (% of Total CD19 <sup>+</sup> B cells)                                |             |          |
| % CD19 <sup>+</sup> TACI <sup>+</sup> (% Total B cells)                                            | > 3.4       | 34.4     |
| % CD19 <sup>+</sup> BAFF Receptor <sup>+</sup> (% Total B cells)                                   | > 90.2      | 93.0     |
| BAFF level (pg/mL)                                                                                 | 241 – 1,748 | 711      |
| <b><i>Autoimmune Serologies<sup>1</sup></i></b>                                                    |             |          |
| Adrenal Antibody                                                                                   | Negative    | Negative |
| Thyroid Peroxidase Antibody (IU/mL)                                                                | < 10        | < 35     |
| Islet Cell Autoantibody 512 (U/mL)                                                                 | < 0.8       | < 0.8    |
| Anti-Tissue Transglutaminase IGA Antibody                                                          | 0 – 19      | Negative |
| <b><i>T cell Phenotyping<sup>3</sup></i></b>                                                       |             |          |
| % Naïve CD4 <sup>+</sup> CD45RA <sup>+</sup> T cells (% of CD4 cells)                              | 3 – 59      | 18       |
| Absolute (cells/mcL)                                                                               | 27 – 833    | 120      |
| % Naïve CD4 <sup>+</sup> CD62L <sup>+</sup> CD27 <sup>+</sup> T cells (% of CD4 cells)             | 2 – 58      | 17       |
| Absolute (cells/mcL)                                                                               | 11 – 824    | 113      |
| % Naïve CD8 <sup>+</sup> CD45RA <sup>+</sup> T cells (% of CD8 cells)                              | 6 – 84      | 83       |
| Absolute (cells/mcL)                                                                               | 19 – 508    | 149      |
| % Naïve CD8 <sup>+</sup> CD62L <sup>+</sup> CD27 <sup>+</sup> T cells (% of CD8 cells)             | 2 – 78      | 77       |
| Absolute (cells/mcL)                                                                               | 5 – 475     | 138      |
| % CD4 <sup>+</sup> CD45RO <sup>+</sup> Memory T cells (% of CD4 cells)                             | 15 – 69     | 78       |
| Absolute (cells/mcL)                                                                               | 167 – 670   | 520      |
| % CD4 <sup>+</sup> CD62L <sup>+</sup> CD27 <sup>+</sup> CD45RO <sup>+</sup> cells (% of CD4 cells) | 6 – 47      | 69       |
| Absolute (cells/mcL)                                                                               | 58 – 413    | 460      |

|                                                                                              |              |          |
|----------------------------------------------------------------------------------------------|--------------|----------|
| % CD4 <sup>+</sup> CD62L <sup>+</sup> CD27 <sup>-</sup> CD45RO <sup>+</sup> (% of CD4 cells) | 0.7 – 12.0   | 0.7      |
| Absolute (cells/mL)                                                                          | 7 – 99       | 5        |
| % CD8 <sup>+</sup> CD45RO <sup>+</sup> Memory T cells (% of CD8 cells)                       | 4 – 49       | 10       |
| Absolute (cells/mL)                                                                          | 15 – 275     | 18       |
| % CD8 <sup>+</sup> CD62L <sup>+</sup> CD27 <sup>+</sup> CD45RO <sup>+</sup> (% of CD8 cells) | 1 – 18       | 7        |
| Absolute (cells/mL)                                                                          | 6 – 135      | 13       |
| % CD8 <sup>+</sup> CD62L <sup>+</sup> CD27 <sup>-</sup> CD45RO <sup>+</sup> (% of CD8 cells) | 0 – 6        | 0        |
| Absolute (cells/mL)                                                                          | 0 – 36       | 0        |
| <b><i>Evaluation of Thymic Function</i></b> <sup>3</sup>                                     |              |          |
| CD4 Recent Thymic Emigrants (% of CD4)                                                       | 6.4 – 51.0   | 15.4     |
| CD8 Recent Thymic Emigrants (% of CD8)                                                       | 0.0 – 0.6    | 0.5      |
| <b><i>Antibody Response to Vaccination</i></b> <sup>1</sup>                                  |              |          |
| Diphtheria Antitoxoid Ab (IU/mL) <sup>1</sup>                                                | ≥ 0.01       | 0.15     |
| Haemophilus Influenza Type B Ab (mcg/mL)                                                     | >1.0         | 1.15     |
| Hepatitis B surface Ab                                                                       | Non-Reactive | Reactive |
| Measles IgG Ab                                                                               | ≥ 1.10       | 4.70     |
| Mumps Virus IgG Ab                                                                           | ≥ 1.10       | 2.02     |
| Bordetella Pertussis IgG Ab                                                                  |              |          |
| Pertussis Toxin IgG (IU/mL)                                                                  | < 45         | 5        |
| Filamentous Hemagglutinin IgG (IU/mL)                                                        | <90          | 40       |
| Poliovirus Ab Neutralization                                                                 |              |          |
| Polio 1 titer                                                                                | ≥ 1:8        | >1:128   |
| Polio 2 titer                                                                                | ≥ 1:8        | >1:128   |

|                               |             |          |
|-------------------------------|-------------|----------|
| Polio 3 titer                 | $\geq 1:8$  | $>1:128$ |
| Rubella IgG Ab                | $\geq 1.10$ | 4.28     |
| Tetanus Antitoxoid Ab (IU/mL) | $> 0.15$    | 0.56     |
| Varicella Zoster Virus IgG Ab | $\geq 1.10$ | 1.48     |

<sup>1</sup> denotes reference range from Quest Diagnostics; <sup>2</sup> denotes reference range from Focus Diagnostics; <sup>3</sup> denotes reference range from Mayo Medical Laboratories; and <sup>4</sup> denotes reference range from Cincinnati Children's Hospital Medical Center. Abbreviations: mg: milligram, dL: deciliter, Foxp3: forkhead box P3, mL: microliter; Treg: Regulatory T cell, BAFF: B cell activating factor, CVID: common variable immune deficiency, TAC1: tumor necrosis factor receptor superfamily member 13B, pg: picogram, mL: milliliter, IgA: immunoglobulin A, IU: international units, U: units, Ab: antibody, mcg: microgram, IgG: immunoglobulin, NA: not applicable.

**Supplemental Table II. Long-Range PCR Primers for Sequencing**

| <b>Gene</b>          | <b>Primer Sequence</b> |                               |
|----------------------|------------------------|-------------------------------|
| NFAT5 -1 sequencing  | Forward                | CTCTGCTACCCTGTATACTGACTAATG   |
|                      | Reverse                | GACGCTATGCTAGGCAATTTAATACAC   |
| NFAT5 -2 sequencing  | Forward                | TGTCATAATCATAGAGATGATCAGGGAGG |
|                      | Reverse                | AATAGGGGATACTGGTACTACATCGCAGG |
| NFAT5 -3 sequencing  | Forward                | CGATGTAGTACCAGTATCCCTATTTCGT  |
|                      | Reverse                | AAGTCATCTGTAGTCTAGTCTGGCTTATC |
| NFAT5 -4 sequencing  | Forward                | CATAATTGTGTGGTATGTGGAAAGGAG   |
|                      | Reverse                | AAGTCTCTTAATCATCTGGGACGTTTG   |
| NFAT5 -5 sequencing  | Forward                | CTGGAATTGGAACTTTTCTGCAGTCC    |
|                      | Reverse                | CATTATTTTCAGCAAATCTCACCCAACC  |
| NFAT5 -6 sequencing  | Forward                | TATGGCAGCCCTCTAAATCTTCTTCA    |
|                      | Reverse                | CAGTACTCAGAACACGGAAGTTACAAG   |
| NFAT5 -7 sequencing  | Forward                | CAGGTACAATGTTGTTTCTTCACCACT   |
|                      | Reverse                | GGTACTTCATGTTATGCCACAGTATC    |
| NFAT5 -8 sequencing  | Forward                | GGACAGATTCTTGATCTTCTGAACTTGC  |
|                      | Reverse                | TCTAAGGCTTAACTATCTTCCACTGGG   |
| NFAT5 -9 sequencing  | Forward                | AAGTGTGTACAGTGGAAATCTTGGTTG   |
|                      | Reverse                | CCAGTAACGATGGTGAACCTTGAATTGT  |
| NFAT5 -10 sequencing | Forward                | CCACTATTTGTTCACTTAGCACTCTTG   |
|                      | Reverse                | CATTGGTCTAACTAGTGTGCAGTTCC    |
| NFAT5 -11 sequencing | Forward                | CATAGGTCACCAGAAGGATTATGCGG    |
|                      | Reverse                | GTATCCCAAGTATTCACCTCTAGTTTGG  |
| NFAT5 -12 sequencing | Forward                | GCGTAGGGATATTGAAATTGAGGAATGC  |
|                      | Reverse                | TACGAATTCCTAAGTCAGGTCTTGATCC  |
| NFAT5 -13 sequencing | Forward                | CTTTCACTTGGACTTGGCACATTACTTC  |
|                      | Reverse                | GATGCAGAAGCTCATCAGGAAACAAATC  |
| NFAT5 -14 sequencing | Forward                | GAACTCTGCCTTTCTCTTATAAGGATGC  |
|                      | Reverse                | AAGTGAGACTAGGTAGAGAAAGTTGAGC  |
| NFAT5 -15 sequencing | Forward                | CCACTTGGAGATTGGAGAATTTAGAGG   |
|                      | Reverse                | CGATGTTCTGGTTGGTGTTTATAGAGGA  |
| NFAT5 -16 sequencing | Forward                | G TTCAGAATAGTGGTACCCAACAACAAG |
|                      | Reverse                | TAAGAAGGGAGGAATGTA ACTAGAGCAG |
